# Supplementary material for: MYC-repressed long noncoding RNAs antagonize MYC-induced cell proliferation and cell cycle progression
Source: PubMed Central journal article supplement (PMC4662455; doi:10.18632/oncotarget.3909), 2015-05-11
Supplement: oncotarget-06-18780-s001.pdf [file oncotarget-06-18780-s001.pdf]

## SUPPLEMENTARY FIGURES AND TABLES

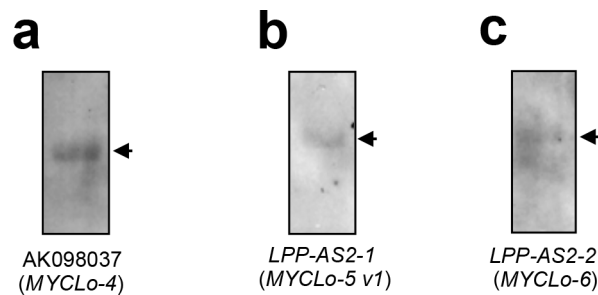

**Supplementary Figure S1 (related to figure 1): Confirmation of expression of MYC-repressed lncRNAs.** Verification of MYCLo-4, -5 and -6 expression with Northern blot analysis.

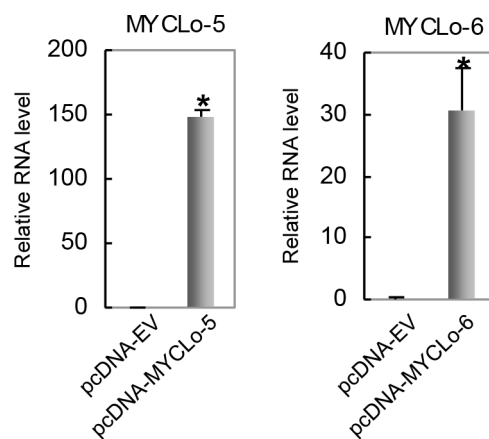

**Supplementary Figure S2 (related to figure 4): Confirmation of exogenous expression of MYCLo-5 & -6.** Verification of MYCLo-5 and -6 expression levels in HCT116 cells transfected with pcDNA3.3 control vector (EV) or pcDNA3.3-MYCLo-5/6 vectors. Data are mean  $\pm$  S.D. of three independent experiments and each measured in triplicate (\*,  $p < 0.01$ ).

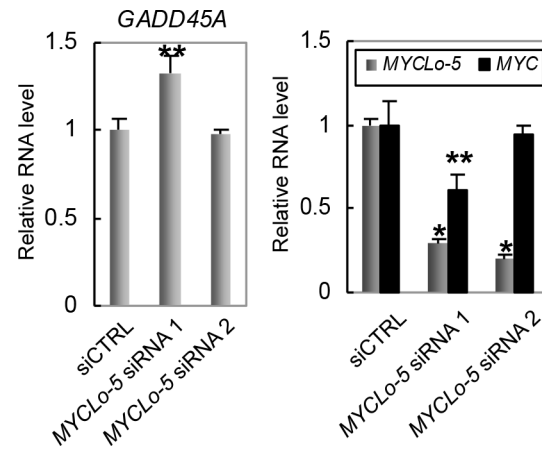

**Supplementary Figure S3 (related to figure 5): No effect of MYCLo-5 knockdown on GADD45A expression.** MYCLo-5 is not involved in regulation of GADD45A expression. qRT-PCR results showing that knockdown of MYCLo-5 does not affect GADD45A expression. Data are mean  $\pm$  S.D. of three independent experiments and each measured in triplicate (\*\*,  $p < 0.05$ ; \*,  $p < 0.01$ ).

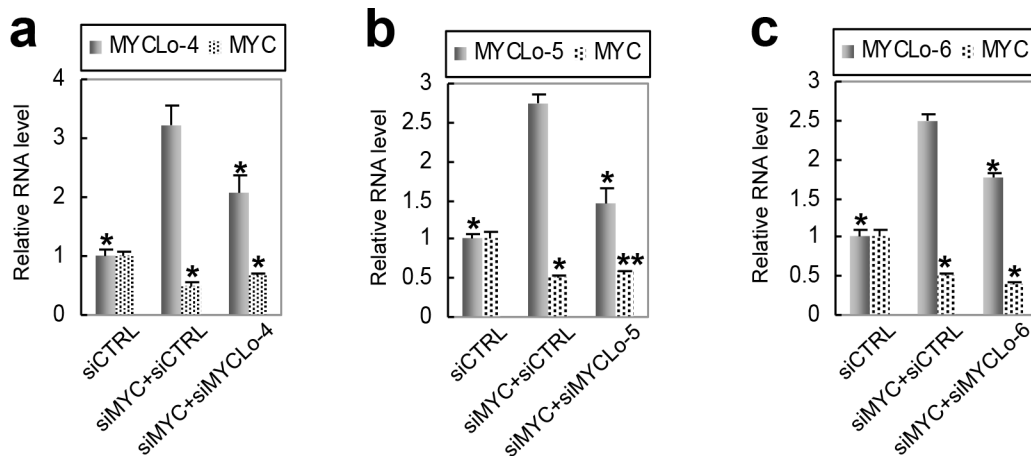

**Supplementary Figure S4 (related to figure 5): Confirmation of MYC and MYCLOs (MYCLO-4, -5 and -6) expression levels using qRT-PCR.** Total RNA samples used in Fig. 5g were used to determine the expression levels of MYC a-c., MYCLO-4 (a), MYCLO-5 (b) and MYCLO-6 (c). Data are mean  $\pm$  S.D. of three independent experiments and each measured in triplicate (\*\*,  $p < 0.05$ ; \*,  $p < 0.01$ ).

**Supplementary Table S1: The list of genes dysregulated by siMYCLO-4 in PC3.**

**Supplementary Table S2: The list of genes dysregulated by siMYCLO-5 in PC3.**

**Supplementary Table S3: The list of genes dysregulated by siMYCLO-6 in PC3.**

**Supplementary Table S4: The list of genes dysregulated by siMYC in PC3.**

**Supplementary Table S5: List of primers used for RACE, PCR, Sequencing and Cloning.**

**Supplementary Table S6: Information of custom and prebuilt siRNAs.**
